# Supplementary material for: Enhancing surface oxygen retention through theory-guided doping selection in Li1−xNiO2 for next-generation lithium-ion batteries
Source: Royal Society of Chemistry journal article supplement (doi:10.1039/d0ta07706b), 2020-01-01
Supplement: d0ta07706b1.pdf [file d0ta07706b1.pdf]

# **Supporting Information**

## **Enhancing Surface Oxygen Retention through Theory-guided Doping Selection in layered Ni-rich Cathodes for Next-generation Lithium-ion Batteries**

Jianli Cheng,<sup>†,‡</sup> Linqin Mu,<sup>¶</sup> Chunyang Wang,<sup>§</sup> Zhijie Yang,<sup>¶</sup> Huolin L. Xin,<sup>§</sup>  
Feng Lin,<sup>¶</sup> and Kristin A. Persson<sup>\*,†,‡</sup>

<sup>†</sup>*Department of Materials Science and Engineering, University of California, Berkeley, CA  
94720-1760, USA*

<sup>‡</sup>*Energy Storage and Distributed Resources Division, Lawrence Berkeley National  
Laboratory, Berkeley CA 94720, USA*

<sup>¶</sup>*Department of Chemistry, Virginia Tech, Blacksburg, Virginia 24061, United States*

<sup>§</sup>*Department of Physics and Astronomy, University of California, Irvine, CA 92697, USA*

E-mail: [kapersson@lbl.gov](mailto:kapersson@lbl.gov)

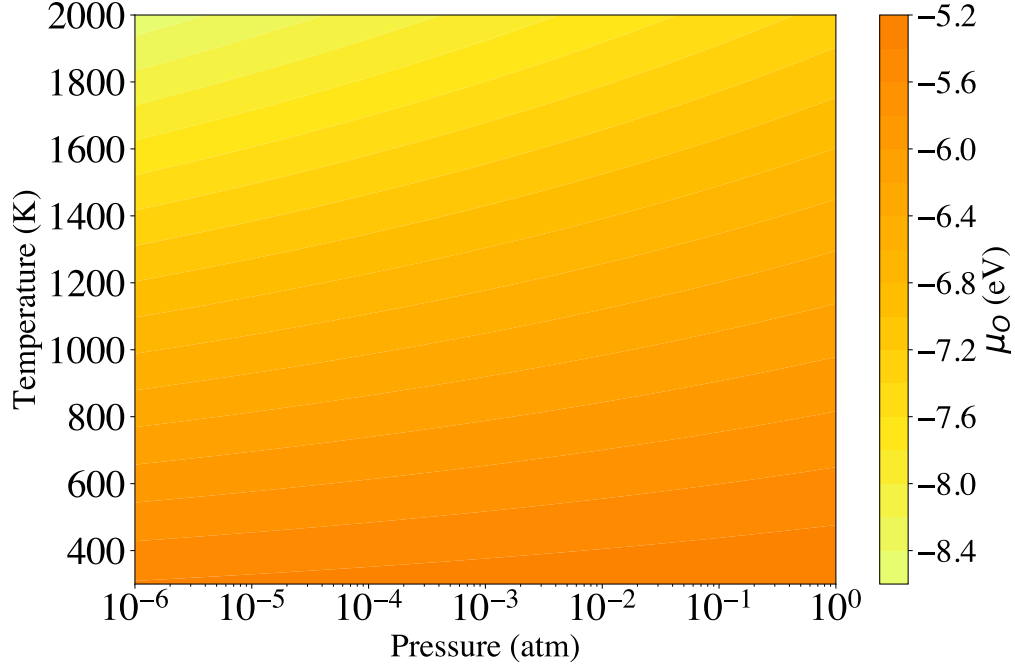

Figure S1: Calculated  $\mu_O$  as a function of  $T$  and  $P$

### Oxygen Chemical Potential Dependence of Temperature and Pressure

Oxygen chemical potential ( $\mu_O$ ) is related to the sample preparation environment, and can be further expressed as:  $\mu_O(T, P) = \mu_O + \Delta\mu_O(T, P)$ . For the elemental reference  $\mu_O$ , we choose the total energy of the isolated ground state  $O_2$  molecule. At temperature  $T_0=298$  K and pressure  $P_0=1$  atm,  $O_2$  standard enthalpy  $H_0=8.7$  KJ mol<sup>-1</sup> and entropy  $S_0=205$  J mol<sup>-1</sup> K<sup>-1</sup>.<sup>1</sup> The relative oxygen chemical potential  $\Delta\mu_O$  at temperature  $T$  and pressure  $P_0$  can be expressed as:<sup>2</sup>

$$\Delta\mu_O(T, P_0) = \frac{1}{2} \{ [H_0 + \Delta H(T)] - T[S_0 + \Delta S(T)] \} \quad (1)$$

where  $\Delta H(T) = C_P(T - T_0)$  and  $\Delta S(T) = C_P \ln(T/T_0)$ . Applying the ideal gas law for  $T \geq 298$  K, the constant-pressure heat capacity  $C_P$  per diatomic molecule is  $C_P = 3.5k_B$ . For pressure other than  $P_0=1$  atm,  $\mu_O(T, P) = \mu_O(T, P_0) + \frac{1}{2}k_B T \ln(P/P_0)$ .<sup>3</sup> As a result, we are able to relate oxygen chemical potential with the corresponding temperature and pressure. Fig. S1 illustrates the change of  $\mu_O$  as a function of  $T$  and  $P$ .

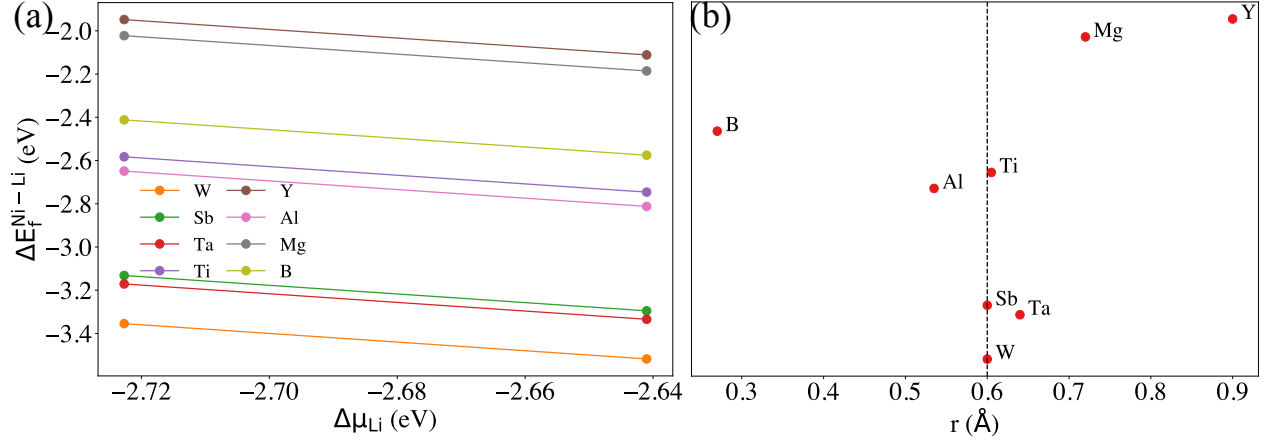

Figure S2: (a) Calculated doping formation energy difference ( $\Delta E_f^{Ni-Li}$ ) between doping at Ni- and Li-site of doped-LiNiO<sub>2</sub> as a function of relative lithium chemical potential ( $\Delta\mu_{Li}$ ). (b) Doping formation energy difference of the dopants as a function of their corresponding ionic radii.<sup>4</sup> The vertical dashed line represents the ionic radius of  $Ni^{3+}$

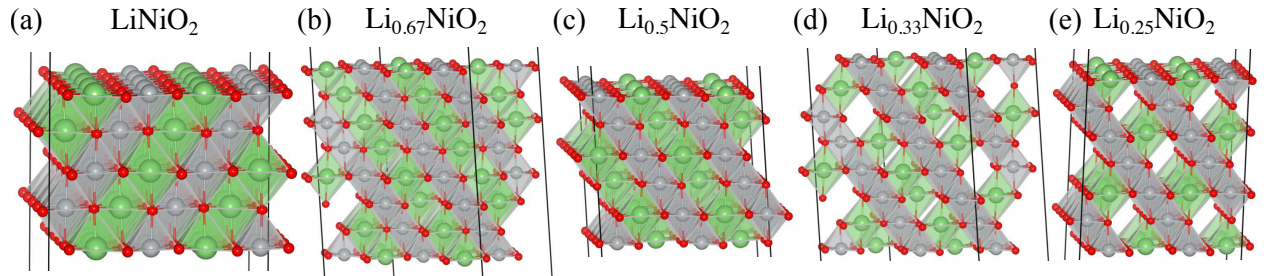

Figure S3: The configurations of  $Li_{1-x}NiO_2$  slab models with (104) surface facet with (a)  $x=0$ , (b)  $x=0.33$ , (c)  $x=0.5$ , (d)  $x=0.67$ , (e)  $x=0.75$ . (Color code: green for Li atom, grey for Ni atom and red for O atom).

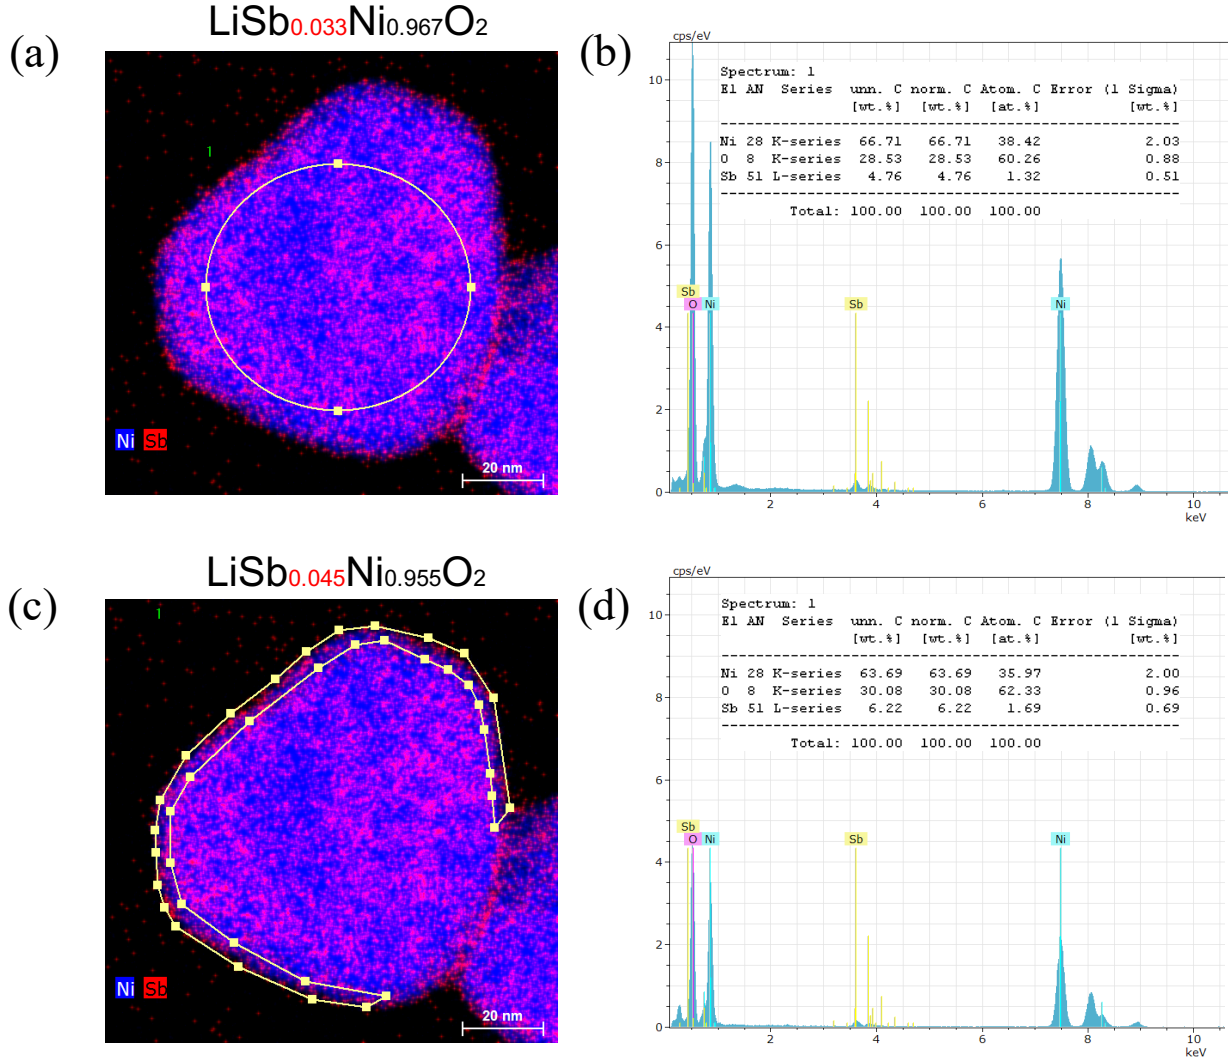

Figure S4: (a) Overlapped EDS map of Sb and Ni in doped-LiNiO<sub>2</sub>. (b) Integrated EDS spectrum from the circled region (interior of the particle) and the compositional quantification of O, Ni and Sb. (c,d) Integrated EDS spectrum from the selected region (surface of the particle) in (c) and quantification of the compositions of O, Ni and Sb. The ratios of Sb/(Sb+Ni) in the interior region and surface region are determined as 3.3 and 4.5 at.%, respectively.

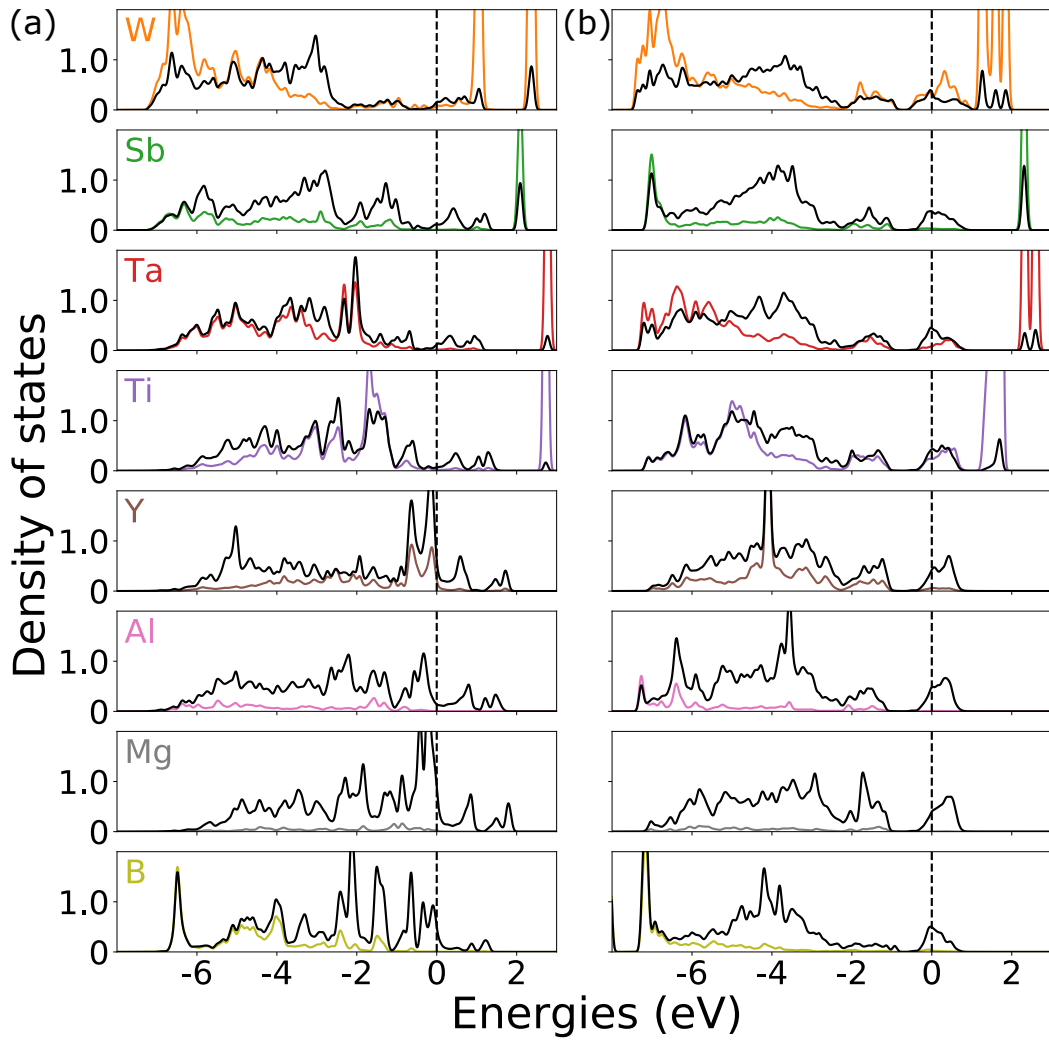

Figure S5: Calculated partial density of states (PDOS) for dopants and neighboring oxygen atoms at the surface (a) and the bulk layer (b) in doped-LiNiO<sub>2</sub>. Black solid lines represent oxygen PDOS.

## References

- (1) Haynes, W. M. CRC Handbook Chemistry and Physics. *CRC Press* **2016**,
- (2) Osorio-Guillen, J.; Lany, S.; Barabash, S. V.; Zunger, A. Magnetism without magnetic ions: percolation, exchange, and formation energies of magnetism-promoting intrinsic defects in CaO. *Phys Rev Lett* **2006**, *96*, 107203.
- (3) Reuter, K.; Scheffler, M. Composition, structure, and stability of RuO<sub>2</sub>(110) as a function of oxygen pressure. *Physical Review B* **2001**, *65*.
- (4) Shannon, R. Revised effective ionic radii and systematic studies of interatomic distances in halides and chalcogenides. *Acta Crystallographica Section A* **1976**, *32*, 751–767.
